# Supplementary material for: How Should We Treat Meningeal Melanocytoma? A Retrospective Analysis of Potential Treatment Strategies
Source: MDPI journal article supplement (doi:10.3390/cancers14235851), 2022-11-27
Supplement: s1 [file s1]

**Table S1.** This table lists 201 case reports that report patients with meningeal melanocytoma. Here, the focus was primarily on gender, age, location of the tumor, therapy, and outcome.

| Case                                    | Age | Sex | Location           | Initial Therapy             | Follow-Up Outcome |
|-----------------------------------------|-----|-----|--------------------|-----------------------------|-------------------|
| (A. Das et al., 2001)                   | 50  | M   | Spine              | Partial Resection + RT      | Recurrence, Death |
| (Adib et al., 2019)                     | 45  | M   | Intracranial       | Partial Resection           | No Data           |
| (Adib et al., 2019)                     | 54  | M   | Intracranial       | Partial Resection           | No Data           |
| (Adib et al., 2019)                     | 56  | F   | Intracranial       | Surgery                     | No Data           |
| (Adib et al., 2019)                     | 33  | F   | Intracranial       | Surgery                     | Recurrence        |
| (Ahluwalia et al., 2003)                | 16  | M   | Intracranial       | Total Resection             | No Recurrence     |
| (Aimar et al., 2003)                    | 27  | M   | Intracranial       | Surgery                     | No Data           |
| (Aissaoui et al., 2015)                 | 21  | M   | Intracranial       | No Treatment                | Death             |
| (Akgun et al., 2020)                    | 30  | F   | Spine              | Total Resection             | No Recurrence     |
| (Al-Abdulwahhab et al., 2020)           | 23  | M   | Intracranial       | Partial Resection           | No Recurrence     |
| (Alameda et al., 1998)                  | 65  | M   | Spine              | Total Resection             | No Recurrence     |
| (Albano et al., 2019)                   | 51  | M   | Intracranial       | Surgery                     | Recurrence        |
| (Albano et al., 2019)                   | 35  | F   | Intracranial       | Total Resection             | No Recurrence     |
| (Ali et al., 2009)                      | 31  | M   | Intracranial+Spine | Partial Resection           | Recurrence, Death |
| (Armocida et al., 2019)                 | 60  | M   | Spine              | Total Resection             | No Recurrence     |
| (Asanuma et al., 2008)                  | 29  | M   | Spine              | Total Resection             | No Recurrence     |
| (Balmaceda et al., 1993)                | -   | -   | No Data            | No Data                     | No Data           |
| (Balmaceda et al., 1993)                | -   | -   | No Data            | No Data                     | No Data           |
| (Barth et al., 1993)                    | 49  | F   | Spine              | Surgery                     | Recurrence, Death |
| (Bejarano et al., 1995)                 | 46  | M   | Spine              | Total Resection             | No Data           |
| (Beseoglu et al., 2006)                 | 55  | M   | Intracranial       | Partial Resection + RT      | No Recurrence     |
| (Bhargava et al., 2011)                 | 55  | M   | Spine              | Partial Resection           | No Data           |
| (Bir et al., n.d.)                      | 22  | M   | Intracranial       | Total Resection + RT        | No Recurrence     |
| (Botticelli et al., 1983)               | 43  | F   | Intracranial       | No Data                     | No Data           |
| (Bourhis et al., 2019)                  | 61  | -   | No Data            | No Data                     | Recurrence        |
| (Brito et al., n.d.)                    | -   | -   | No Data            | Partial Resection           | No Data           |
| (Bydon et al., 2003)                    | 79  | F   | Spine              | Partial Resection           | Recurrence, Death |
| (C. J. Chen et al., 1997)               | 41  | F   | Intracranial       | Total Resection             | No Recurrence     |
| (C. Wang et al., 2022)                  | 56  | M   | Spine              | Partial Resection           | No Recurrence     |
| (Caruso et al., n.d.)                   | 62  | M   | Spine              | Total Resection             | No Recurrence     |
| (Châabane et al., 2003)                 | -   | -   | Intracranial       | No Data                     | No Data           |
| (Chacko & Rajshekhar, 2008)             | 22  | M   | Spine              | Partial Resection           | No Recurrence     |
| (Chan et al., 2021)                     | 18  | F   | Intracranial       | Total Resection             | No Recurrence     |
| (Chow et al., 2001)                     | 46  | F   | Intracranial       | Total Resection             | No Recurrence     |
| (Clarke et al., 1998)                   | 30  | F   | Intracranial       | Partial Resection + RT      | Recurrence, Death |
| (Clarke et al., 1998)                   | 21  | F   | Spine              | Partial Resection + RT      | Recurrence        |
| (Classen et al., 2002)                  | 57  | M   | Intracranial       | Definite Radiotherapy       | No Recurrence     |
| (Crouzet et al., 1992)                  | 64  | M   | Spine              | No Data                     | No Data           |
| (Cusumano et al., 1998)                 | 70  | -   | Intracranial       | Surgery                     | Recurrence        |
| (Czarnecki et al., n.d.)                | 69  | F   | Spine              | Total Resection             | No Data           |
| (Czirják et al., 2000)                  | 48  | M   | Intracranial       | Total Resection             | No Recurrence     |
| (D. F. O'Brien et al., 2006)            | 10  | -   | Intracranial       | Partial Resection           | No Data           |
| (de Tella et al., 2003)                 | 35  | M   | Orbita             | Partial Resection + RT + CT | Recurrence        |
| (Delhay et al., 2001)                   | 38  | F   | Spine              | Surgery                     | Recurrence, Death |
| (Deng et al., 2022)                     | 19  | F   | Spine              | Total Resection             | Recurrence, Death |
| (Doglietto et al., 2012)                | 20  | M   | Intracranial       | Partial Resection + RT      | Recurrence, Death |
| (Donofrio et al., 2022)                 | 48  | F   | Intracranial       | Partial Resection + RT      | No Recurrence     |
| (Dorwal et al., 2014; Yin et al., 2019) | 32  | F   | Spine              | Total Resection             | No Recurrence     |
| (El-Khashab et al., 2009)               | 17  | F   | Spine              | Partial Resection           | No Data           |
| (Elbadry et al., 2018)                  | 46  | M   | Intracranial       | Total Resection             | No Data           |
| (Eskandari & Schmidt, 2010)             | 45  | M   | Spine              | Partial Resection           | Recurrence        |
| (Eun et al., 2011)                      | 57  | M   | Spine              | Total Resection             | No Recurrence     |
| (F. Wang & Ling, 2018)                  | 32  | F   | Intracranial       | Total Resection             | No Recurrence     |
| (F. Wang et al., 2007)                  | 57  | M   | Spine              | Total Resection             | Recurrence        |
| (F. Wang et al., 2011)                  | 35  | M   | Intracranial       | Total Resection             | Recurrence        |
| (Fagundes-Pereyra et al., 2005)         | 42  | F   | Intracranial       | Total Resection             | No Recurrence     |
| (Fan et al., 2012)                      | 48  | M   | Intracranial       | No Data                     | No Data           |
| (Faro et al., n.d.)                     | 30  | F   | Intracranial       | Total Resection             | No Recurrence     |

|                                    |    |   |                    |                             |                   |
|------------------------------------|----|---|--------------------|-----------------------------|-------------------|
| (Fernandez et al., 2020)           | 67 | M | Intracranial       | Definite Radiotherapy       | Recurrence, Death |
| (Ferracini et al., 1980)           | 46 | F | Spine              | Total Resection             | Recurrence, Death |
| (Flores et al., 2021)              | 69 | M | Spine              | Partial Resection           | No Data           |
| (Foit et al., 2013)                | 43 | - | Spine              | Partial Resection + RT      | No Recurrence     |
| (Franken et al., 2009)             | 26 | M | Intracranial       | Partial Resection + RT      | No Recurrence     |
| (Gamoh et al., 2018)               | 39 | M | Intracranial       | Total Resection + RT        | No Recurrence     |
| (Ganesan et al., 2017)             | 34 | M | Spine              | Total Resection             | No Data           |
| (Gardiman' et al., 1996)           | 19 | M | Intracranial       | Partial Resection           | No Recurrence     |
| (Gardiman' et al., 1996)           | 43 | M | Intracranial       | Partial Resection           | Recurrence, Death |
| (Gempt et al., 2011)               | 71 | F | Intracranial       | Total Resection             | Recurrence        |
| (Gill Naul et al., 1991)           | 68 | F | Intracranial       | Total Resection             | No Recurrence     |
| (Gonçalves et al., 2002)           | 0  | F | Spine              | Total Resection             | No Data           |
| (González-Tortosa et al., 2009)    | 56 | M | Intracranial       | Total Resection             | No Data           |
| (Goyal et al., 2003)               | 33 | F | Spine              | Partial Resection + RT      | No Data           |
| (Gupta et al., 2007)               | 58 | F | Intracranial       | Partial Resection           | No Recurrence     |
| (H. Chen et al., 2015)             | 20 | F | Intracranial       | Total Resection             | No Data           |
| (Hamasaki et al., 2002)            | 59 | M | Intracranial       | Partial Resection           | Recurrence        |
| (Hean et al., 2021)                | 70 | M | Spine              | Partial Resection + RT + CT | Recurrence, Death |
| (Hino et al., 2005)                | 75 | F | Intracranial       | Partial Resection           | No Recurrence     |
| (Hioki et al., 2012)               | 72 | M | Spine              | Partial Resection           | No Recurrence     |
| (Hirose et al., 1997)              | 66 | M | Intracranial       | Total Resection             | Recurrence, Death |
| (Hoffmann et al., 2016)            | 58 | F | Spine              | Total Resection + RT        | No Data           |
| (Horn et al., 2008)                | 48 | M | Spine              | Total Resection             | Recurrence        |
| (Horn et al., 2008)                | 37 | F | Spine              | Total Resection             | Recurrence        |
| (Horn et al., 2008)                | 37 | F | Spine              | Total Resection             | Recurrence        |
| (Hou et al., 2012)                 | -  | - | No Data            | Partial Resection + RT      | No Recurrence     |
| (Hou et al., 2012)                 | -  | - | No Data            | Partial Resection + RT      | No Recurrence     |
| (Hou et al., 2012)                 | -  | - | No Data            | Partial Resection + RT      | No Recurrence     |
| (Hou et al., 2012)                 | -  | - | No Data            | Partial Resection + RT      | No Recurrence     |
| (Hou et al., 2012)                 | -  | - | No Data            | Partial Resection + RT      | Death             |
| (Ibáñez et al., 1997)              | 44 | F | Spine              | Total Resection             | No Recurrence     |
| (Iida et al., 2002)                | 52 | M | Spine              | Partial Resection           | No Recurrence     |
| (Iida et al., 2002)                | 42 | M | Spine              | Surgery                     | Recurrence, Death |
| (J. K. Lee et al., 2017)           | 45 | M | Spine              | Total Resection             | No Recurrence     |
| (Jellinger et al., 1988)           | 27 | F | Intracranial       | Total Resection             | Recurrence        |
| (Ju-Sung Seo, n.d.)                | 58 | M | Spine              | Total Resection             | No Recurrence     |
| (K. Das et al., 2017)              | 17 | M | Intracranial       | Total Resection             | No Recurrence     |
| (K. T. K. Chen, n.d.)              | 65 | F | Spine              | Partial Resection + RT      | No Data           |
| (Kang et al., 2006)                | 29 | M | Intracranial       | Partial Resection           | No Data           |
| (Khadilkar et al., n.d.)           | 58 | F | Spine              | No Data                     | No Data           |
| (Kim et al., 2013)                 | 37 | M | Spine              | Partial Resection + RT      | Recurrence, Death |
| (Kini et al., 2009)                | 35 | M | Intracranial       | Total Resection             | Recurrence        |
| (Kinnen et al., 2019)              | 64 | M | Spine              | Partial Resection           | No Recurrence     |
| (Koch et al., 2005)                | 38 | M | Intracranial       | Total Resection             | Recurrence, Death |
| (Koenigsmann et al., n.d.)         | 57 | M | Intracranial       | Total Resection             | Recurrence, Death |
| (Kordás et al., 1996)              | 12 | F | Spine              | Total Resection + RT        | No Recurrence     |
| (Kraft Roverea et al., 2014)       | 54 | F | Spine              | No Data                     | No Data           |
| (Kuo et al., 2019)                 | 51 | F | Intracranial       | Total Resection             | Recurrence        |
| (Kurita et al., 2000)              | 29 | M | Intracranial       | Partial Resection           | Recurrence        |
| (Küstters-Vandeveldt et al., 2017) | 43 | F | Intracranial       | Total Resection + RT        | Recurrence, Death |
| (Lach et al., 1988)                | 20 | F | Spine              | Total Resection             | No Recurrence     |
| (Leonardi1 et al., n.d.)           | 67 | M | Intracranial       | Total Resection             | No Recurrence     |
| (Limas & Tio, 1972)                | 71 | M | Intracranial       | No Treatment                | Death             |
| (Lin et al., 2012)                 | 27 | M | Intracranial       | Total Resection + RT        | No Recurrence     |
| (Litofsky et al., 1992)            | 32 | M | Intracranial       | Total Resection             | No Recurrence     |
| (Maaloul et al., 2021)             | 30 | M | Intracranial       | No Treatment                | Recurrence        |
| (Maiuri et al., 1995)              | 69 | M | Intracranial       | Partial Resection           | No Recurrence     |
| (Malik et al., 1999)               | 48 | M | Spine              | Total Resection             | No Recurrence     |
| (Mangels et al., 2006)             | 35 | F | Spine              | Partial Resection + RT      | No Recurrence     |
| (Marwaha et al., 2016)             | 21 | M | Intracranial       | Partial Resection + RT      | No Recurrence     |
| (Mathai et al., 2008)              | 40 | M | Orbita             | Total Resection             | No Recurrence     |
| (Matsumoto et al., 1998)           | 48 | M | Spine              | Total Resection             | No Recurrence     |
| (Matsuno et al., 2019)             | 35 | F | Intracranial       | Partial Resection           | No Recurrence     |
| (Merciadri et al., 2011)           | 68 | M | Intracranial+Spine | Partial Resection + RT      | No Recurrence     |
| (Mitchell & Funt, 1998)            | 49 | M | Intracranial       | No Treatment                | No Data           |

|                                   |     |   |              |                                  |                   |
|-----------------------------------|-----|---|--------------|----------------------------------|-------------------|
| (Miura et al., 2020)              | 40  | M | Spine        | Total Resection                  | No Recurrence     |
| (Munoz-Hidalgo, 2014)             | 15  | M | Intracranial | Total Resection                  | No Recurrence     |
| (Muthappan et al., 2012)          | 61  | F | Spine        | Total Resection                  | No Recurrence     |
| (N. K. Lee et al., 2015)          | 15  | F | Intracranial | Partial Resection + Radiosurgery | No Recurrence     |
| (Nakahara et al., 2010)           | 0,5 | M | Intracranial | No Treatment                     | Death             |
| (Navas et al., 2009)              | 25  | M | Intracranial | Total Resection                  | Death             |
| (Nicolotto et al., 2018)          | -   | - | Spine        | Surgery + CT                     | No Data           |
| (Offiah & Laitt, n.d.)            | 25  | F | Intracranial | Total Resection                  | No Recurrence     |
| (Oruckaptan et al., 2000)         | 0,5 | M | Intracranial | Partial Resection                | No Recurrence     |
| (Painter et al., 2000)            | 35  | M | Intracranial | Partial Resection                | No Data           |
| (Palicelli et al., 2016)          | 26  | M | Orbita       | Total Resection                  | No Recurrence     |
| (Pan et al., 2011)                | 36  | M | Intracranial | Partial Resection + RT           | No Recurrence     |
| (Perrini et al., 2010)            | 79  | F | Spine        | Partial Resection                | Recurrence        |
| (Phang et al., 2012)              | 40  | M | Intracranial | Partial Resection + RT           | Recurrence, Death |
| (Piercecchi-Marti et al., 2002)   | 25  | M | Intracranial | Total Resection                  | No Recurrence     |
| (Pierson et al., 2016)            | 22  | M | Intracranial | Partial Resection + Radiosurgery | No Recurrence     |
| (Prabhu et al., 1993)             | 67  | F | Intracranial | Surgery                          | No Recurrence     |
| (Prabhu et al., 1993)             | 27  | F | Intracranial | Total Resection + RT             | No Recurrence     |
| (Rades et al., 2001)              | 23  | F | Spine        | Partial Resection                | Recurrence, Death |
| (Rahimi-Movaghgar & Karimi, 2003) | 17  | M | Intracranial | Total Resection                  | No Recurrence     |
| (Rai et al., 2008)                | 35  | M | Intracranial | Total Resection                  | No Data           |
| (Reddy et al., 2012)              | 43  | M | Spine        | Total Resection                  | No Recurrence     |
| (Ren et al., 2015)                | 29  | F | Intracranial | Partial Resection + RT           | No Recurrence     |
| (Roser et al., 2004)              | 37  | F | Intracranial | Partial Resection                | Recurrence, Death |
| (Rousseau et al., 2005)           | 25  | F | Intracranial | Partial Resection                | No Recurrence     |
| (Ruelle et al., 1996)             | 62  | M | Spine        | Total Resection                  | No Recurrence     |
| (Rutten et al., 2005)             | 37  | F | Orbita       | Total Resection                  | Recurrence        |
| (S.-U. Lee et al., 2018)          | 22  | F | Intracranial | Surgery                          | No Data           |
| (Sakar et al., 2022)              | 1,5 | F | Intracranial | Total Resection                  | No Recurrence     |
| (Sakata et al., 2015)             | 31  | F | Intracranial | Partial Resection                | Recurrence        |
| (Salah El-Din et al., 2018)       | 5   | M | Spine        | Partial Resection                | No Data           |
| (Samadian et al., 2015)           | 19  | M | Intracranial | Total Resection                  | No Recurrence     |
| (Samimi et al., 2012)             | 38  | M | Intracranial | Partial Resection                | Recurrence        |
| (San-Miguel et al., 2020)         | 46  | F | Intracranial | Total Resection                  | Recurrence, Death |
| (Sankhla et al., 1996)            | 19  | M | Spine        | Partial Resection                | No Recurrence     |
| (Sato et al., 2009)               | 49  | M | Orbita       | Partial Resection + CT           | No Recurrence     |
| (Schembri et al., 2017)           | 53  | M | Spine        | Surgery                          | No Data           |
| (Schindler et al., 1998)          | 38  | M | Intracranial | Total Resection                  | No Recurrence     |
| (Sethi et al., 2011)              | 40  | M | Spine        | Surgery                          | No Data           |
| (Shaikh et al., 2021)             | 36  | F | Spine        | Total Resection                  | Recurrence, Death |
| (Shanthi et al., 2010)            | 30  | F | Spine        | Total Resection                  | No Data           |
| (Sharma et al., n.d.)             | 26  | F | Spine        | Partial Resection + RT           | No Data           |
| (Shimoda et al., n.d.)            | 75  | F | Spine        | Partial Resection                | No Data           |
| (Shin et al., 2020)               | 56  | F | Intracranial | Surgery + RT                     | No Data           |
| (Shinoda et al., 2000)            | 40  | F | Intracranial | Total Resection                  | No Recurrence     |
| (Shownkeen et al., 2002)          | 38  | M | Spine        | Surgery                          | No Data           |
| (Srirama Jayamma et al., 2015)    | 62  | M | Spine        | Surgery                          | No Data           |
| (Steinberg et al., 1978)          | 71  | F | Spine        | Partial Resection + RT           | Recurrence        |
| (Sun et al., 2015)                | 56  | M | Intracranial | Partial Resection                | Recurrence        |
| (Sung Hye Park et al., 1992)      | 41  | F | Spine        | Partial Resection                | No Data           |
| (T. F. O'Brien et al., 1995)      | 71  | F | Intracranial | No Data                          | No Data           |
| (T. F. O'Brien et al., 1995)      | 39  | - | Intracranial | No Data                          | No Data           |
| (T. F. O'Brien et al., 1995)      | 40  | - | Intracranial | No Data                          | No Data           |
| (T. F. O'Brien et al., 1995)      | 49  | - | Intracranial | No Data                          | No Data           |
| (Tatagiba et al., 1992)           | 40  | M | Spine        | Total Resection                  | No Data           |
| (Tateyama et al., 2020)           | 27  | M | Spine        | Partial Resection                | Recurrence        |
| (Tewari et al., 1990)             | -   | - | No Data      | No Data                          | No Data           |
| (Tewari et al., 1990)             | -   | - | No Data      | No Data                          | No Data           |
| (Tregnago et al., 2015)           | 28  | M | Orbita       | Total Resection                  | No Recurrence     |
| (Tsai et al., 2021)               | 33  | M | Spine        | Total Resection                  | Recurrence        |
| (Tsugu et al., 2009)              | 51  | M | Orbita       | Total Resection                  | No Recurrence     |
| (Turhan et al., 2004)             | -   | - | No Data      | Total Resection                  | No Data           |
| (Turhan et al., 2004)             | -   | M | Spine        | Total Resection                  | No Data           |

|                        |    |   |              |                      |                   |
|------------------------|----|---|--------------|----------------------|-------------------|
| (Uematsu et al., 1992) | 62 | M | Intracranial | Total Resection      | No Recurrence     |
| (Uozumi et al., 2003)  | 49 | M | Intracranial | Total Resection      | Recurrence, Death |
| (URAMARU et al., 2021) | 44 | M | Intracranial | Total Resection      | No Recurrence     |
| (Vaidya et al., 2021)  | 29 | F | Spine        | Partial Resection    | Recurrence        |
| (Verma et al., 1979)   | 71 | F | Spine        | Total Resection + RT | Recurrence        |
| (Vreto et al., 2011)   | 47 | M | Intracranial | Surgery              | No Data           |
| (Winston et al., 1987) | 9  | M | Intracranial | Total Resection      | Recurrence        |
| (Xie & Jiang, 2019)    | 73 | M | Spine        | Total Resection      | No Recurrence     |
| (Yang et al., 2016)    | 41 | F | Spine        | Partial Resection    | Recurrence, Death |
| (Yin et al., 2019)     | 32 | F | Spine        | Total Resection      | No Recurrence     |
| (Yukawa et al., 2003)  | 29 | F | Intracranial | Total Resection      | No Recurrence     |
| (Zeiler & Krcek, 2012) | 25 | F | Intracranial | Partial Resection    | No Recurrence     |
| (Zhi-Qiang Liu, 2021)  | 52 | M | Spine        | Partial Resection    | No Recurrence     |
| (Zhou et al., 2021)    | 32 | M | Orbita       | Radiosurgery         | Recurrence        |
| Our Case               | 25 | M | Intracranial | Total Resection      | Recurrence        |

## References

1. Das, A.; Ratnagopal, P.; Puvanendran, K.; Teo, J.G. Spinal Meningeal Melanocytoma with Hydrocephalus and Intracranial Superficial Siderosis. *Intern. Med. J.* **2001**, *31*, 562–564. <https://doi.org/10.1046/j.1445-5994.2001.00119.x>.
2. Adib, S.D.; Ebner, F.H.; Bornemann, A.; Hempel, J.-M.; Tatagiba, M. Surgical Management of Primary Cerebellopontine Angle Melanocytoma: Outcome, Recurrence and Additional Therapeutic Options. *World Neurosurg.* **2019**, *128*, e835–e840. <https://doi.org/10.1016/j.wneu.2019.05.004>.
3. Ahluwalia, S.; Ashkan, K.; Casey, A.T.H. Meningeal Melanocytoma: Clinical Features and Review of the Literature. *Br. J. Neurosurg.* **2003**, *17*, 347–351. <https://doi.org/10.1080/02688690310001601243>.
4. Aimar, E.; Debernardi, A.; Tancioni, F.; di Ieva, A.; Bossi, P.; Gaetani, P.; Rodriguez y Baena, R. Meningeal Melanocytoma of the Temporal Lobe. An Uncommon Tumor in an Unusual Location. Case Report. *J. Neurosurg. Sci.* **2003**, *47*, 211.
5. Aissaoui, A.; Mosrati, M.A.; Moussa, A.; Belhaj, M.; Bougattas, M.; Zakhama, A.; Chadly, A. Sudden Death and Primary Leptomeningeal Melanocytosis: A Case Report With an Autopsy Diagnosis. *Am. J. Forensic. Med. Pathol.* **2015**, *36*, 199–201. <https://doi.org/10.1097/PAF.0000000000000161>.
6. Akgun, M.Y.; Isler, C.; Ulu, M.O. C6-T1 Intradural Extramedullary Ventral Meningeal Melanocytoma Resected Via Anterior Corpectomy with Reconstruction. *World Neurosurg.* **2020**, *138*, 457–460. <https://doi.org/10.1016/j.wneu.2020.03.122>.
7. Al-Abdulwahhab, A.H.; Al-Sharydah, A.M.; Al-Suhbani, S.S.; Al-Shayji, H.; Al-Saad, I.; Al-Issawi, W. Primary Pigmented Meningeal Melanocytoma Originating in Meckel Cave in a Patient with Carney Complex: A Case Report. *Medicine* **2020**, *99*, e18783. <https://doi.org/10.1097/MD.00000000000018783>.
8. Alameda, F.; Lloreta, J.; Galitó, E.; Roquer, J.; Serrano, S. Meningeal Melanocytoma: A Case Report and Literature Review. *Ultrastruct. Pathol.* **1998**, *22*, 349–356. <https://doi.org/10.3109/01913129809103356>.
9. Albano, L.; Losa, M.; Spatola, G.; Panni, P.; Terreni, M.R.; Barzaghi, L.R.; Mortini, P. Primary Sellar Melanocytoma: Report of Two Cases Treated at the Same Institution and Their Long-Term Outcome. *Br. J. Neurosurg.* **2019**. <https://doi.org/10.1080/02688697.2019.1667485>.
10. Albano, L.; Losa, M.; Spatola, G.; Panni, P.; Terreni, M.R.; Barzaghi, L.R.; Mortini, P. Primary Sellar Melanocytoma: Report of Two Cases Treated at the Same Institution and Their Long-Term Outcome. *Br. J. Neurosurg.* **2019**. <https://doi.org/10.1080/02688697.2019.1667485>.
11. Ali, Y.; Rahme, R.; Moussa, R.; Abadjian, G.; Menassa-Moussa, L.; Samaha, E. Multifocal Meningeal Melanocytoma: A New Pathological Entity or the Result of Leptomeningeal Seeding? *J. Neurosurg.* **2009**, *111*, 488–491. <https://doi.org/10.3171/2009.3.JNS081096>.
12. Armocida, D.; Pesce, A.; Berra, L.V.; Marzetti, F.; Antonelli, M.; Santoro, A. Intradural Extramedullary Dorsal Melanocytoma in the Adult: Case Report and Review of the Literature. *J. Clin. Neurosci.* **2019**, *62*, 248–253. <https://doi.org/10.1016/j.jocn.2018.12.004>.
13. Asanuma, K.; Kasai, Y.; Takegami, K.; Ito, H.; Yoshikawa, T.; Uchida, A. Spinal Neurocutaneous Melanosis without Cutaneous Nevi. *Spine (Phila Pa 1976)* **2008**, *33*, E798–E801. <https://doi.org/10.1097/BRS.0b013e3181808c9a>.
14. Balmaceda, C.M.; Fetell, M.R.; O'Brien, J.L.; Housepian, E.H. Nevus of Ota and Leptomeningeal Melanocytic Lesions. *Neurology* **1993**, *43*, 381. <https://doi.org/10.1212/wnl.43.2.381>.
15. Barth, A.; Pizzolato, G.P.; Berney, J. Intramedullary Meningeal Melanocytoma. *Neurochirurgie* **1993**, *39*, 188–194.
16. Bejarano, B.; Isla, A.; Morales, C.; Paz, J.; Blázquez, M.G. Melanocitoma Meníngeo Espinal. *Neurocirugia* **1995**, *6*, 230–232. [https://doi.org/10.1016/S1130-1473\(95\)70785-0](https://doi.org/10.1016/S1130-1473(95)70785-0).
17. Beseoglu, K.; Knobbe, C.B.; Reifenberger, G.; Steiger, H.-J.; Stummer, W. Supratentorial Meningeal Melanocytoma Mimicking a Convexity Meningioma. *Acta Neurochir.* **2006**, *148*, 485–490. <https://doi.org/10.1007/s00701-005-0705-1>.
18. Bhargava, P.; Grewal, S.S.; Dewan, Y.; Jhawar, S.S.; Jain, V.; Gupta, B. Craniovertebral Junction Melanocytoma: A Case Report. *Turk. Neurosurg.* **2011**. <https://doi.org/10.5137/1019-5149.jtn.5272-11.0>.

19. Bir, H.; Sodhi, S.; Salunke, P.; Sahoo, S.K.; Radotra, B.D.; Kumar, N. Primary Ventral Foramen Magnum Meningeal Melanocytoma. *Neurology* **2014**, *62*, 230.
20. Botticelli, A.R.; Villani, M.; Angiari, P.; Peserico, L. Meningeal Melanocytoma of Meckel's Cave Associated with Ipsilateral Ota's Nevus. *Cancer* **1983**, *51*, 2304–2310. [https://doi.org/10.1002/1097-0142\(19830615\)51:12<2304::aid-cnrc2820511223>3.0.co;2-u](https://doi.org/10.1002/1097-0142(19830615)51:12<2304::aid-cnrc2820511223>3.0.co;2-u).
21. Bourhis, A.; Quintin-Roué, I.; Redon, S.; Bourhis, M.; Magro, E.; Seizeur, R.; Marcorelles, P.; Uguen, A. Transformation d'un Mélanocytome Méningé En Mélanome : Étude Clinique, Histopathologique et Cytogénétique. *Ann. Pathol.* **2019**, *39*, 352–356. <https://doi.org/10.1016/j.annpat.2019.01.010>.
22. Brito, A.B.; Rogerio, F.; Reis, F.; Garmes, H.M.; Vassallo, J.; Lima, C.S. Primary Meningeal Melanocytoma Mimicking a Non-functioning Pituitary Adenoma. *Clin. Neuropathol.* **2016**, *35*, 158. <https://doi.org/10.5414/NP300885>.
23. Bydon, A.; Gutierrez, J.A.; Mahmood, A. Meningeal Melanocytoma: An Aggressive Course for a Benign Tumor. *J. Neurooncol.* **2003**, *64*, 259–263. <https://doi.org/10.1023/a:1025628802228>.
24. Chen, C.J.; Hsu, Y.I.; Ho, Y.S.; Hsu, Y.H.; Wang, L.J.; Wong, Y.C. Intracranial Meningeal Melanocytoma: CT and MRI. *Neuroradiology* **1997**, *39*, 811–814. <https://doi.org/10.1007/s002340050510>.
25. Wang, C.; Shao, X.; Zou, Y. Primary Intramedullary Melanocytoma in the Thoracic Cord: A Case Report and Literature Review. *Transl. Cancer Res.* **2022**, *11*, 928–934. <https://doi.org/10.21037/tcr-21-2132>.
26. Caruso, R.; Marrocco, L.; Wierzbiński, V.; Salvati, M. Intramedullary Melanocytoma: Case Report and Review of Literature. *Tumori* **2009**, *95*, 389–393.
27. Châabane, M.; Ellouze, S.; Hamrouni, A.; Mlika, N.; ben Hammouda, M.; Khoudja, F. Meningeal Melanocytoma: A Rare Meningeal Tumor. *J. Radiol.* **2003**, *84*, 415–416.
28. Chacko, G.; Rajshekhar, V. Thoracic Intramedullary Melanocytoma with Long-Term Follow-up: Case Report. *J. Neurosurg. Spine* **2008**, *9*, 589–592. <https://doi.org/10.3171/SPI.2008.9.08323>.
29. Chan, I.Y.M.; Li, H.; Shi, T.; Hammond, R.R.; Jurkiewicz, M.T. Parietal Convexity Meningeal Melanocytoma: Radiologic-Pathologic Correlation. *Can. J. Neurol. Sci.* **2021**, *48*, 719–721. <https://doi.org/10.1017/cjn.2020.256>.
30. Chen, H.; Liu, W.; Zhang, S.; Xu, J.; Hui, X. Cerebellar Meningeal Melanocytoma Associated with Nevus of Ota: An Extremely Rare Case. *Neurology* **2015**, *85*, 555–556.
31. Chen, K.T.K. Crush Cytology of Melanocytoma of the Spinal Cord. A Case Report. *Acta Cytol.* **2003**, *47*, 1091–1094. <https://doi.org/10.1159/000326654>.
32. Chow, M.; Clarke, D.B.; Maloney, W.J.; Sangalang, V. Meningeal Melanocytoma of the Planum Sphenoidale. Case Report and Review of the Literature. *J. Neurosurg.* **2001**, *94*, 841–845. <https://doi.org/10.3171/jns.2001.94.5.0841>.
33. Clarke, D.B.; Leblanc, R.; Bertrand, G.; Quartey, G.R.; Snipes, G.J. Meningeal Melanocytoma. Report of a Case and a Historical Comparison. *J. Neurosurg.* **1998**, *88*, 116–121. <https://doi.org/10.3171/jns.1998.88.1.0116>.
34. Classen, J.; Hehr, T.; Paulus, W.; Plate, K.; Bamberg, M. Suprasellar Melanocytoma: A Case of Primary Radiotherapy and Review of the Literature. *J. Neuro-Oncol.* **2002**, *58*, 39–46.
35. Crouzet, J.; Richard, S.; Pillet, G.; Muckensturm, B.; Srouf, A.; Pradat, P. Meningeal Melanocytoma or Multiple Pigmented Meningioma of the Spinal Canal. Report of a Case. Review of the Literature. *Rev. Rhum. Mal. Osteoartic.* **1992**, *59*, 738–743.
36. Cusumano, S.; Marchiofi, G.; Trincia, G.; Barotto, V.; Tonetto, G. Malignant Meningeal Melanoma; Springer-Verlag : 1998; Volume 19.
37. Czarnecki, E.J.; Silbergleit, R.; Gutierrez, J.A. MR of Spinal Meningeal Melanocytoma. *Am. J. Neuroradiol.* **1997**, *18*, 180–182.
38. Cziráj, S.; Vitanovic, D.; Slowik, F.; Magyar, A. Primary Meningeal Melanocytoma of the Pineal Region. Case Report. *J. Neurosurg.* **2000**, *92*, 461–465. <https://doi.org/10.3171/jns.2000.92.3.0461>.
39. O'Brien, D.F.; Crooks, D.; Mallucci, C.; Javadpour, M.; Williams, D.; du Plessis, D.; Broome, J.; Foy, P.; Pizer, B. Meningeal Melanocytoma. *Childs Nerv. Syst.* **2006**, *22*, 556–561. <https://doi.org/10.1007/s00381-005-0019-x>.
40. de Tella, O.I.; Agner, C.; Aguiar, P.H.; Herculan, M.A.; Prandini, M.N.; Stavile, J.N. Aggressive Management of Orbital Meningeal Melanocytoma. *Acta Neurochir.* **2003**, *145*, 1121–1126. <https://doi.org/10.1007/s00701-003-0121-3>.
41. Delhay, M.; Menei, P.; Rousselet, M.C.; Diabira, S.; Mercier, P. A Case of Intramedullary Primary Melanocytic Tumor: Meningeal Melanocytoma or Malignant Melanoma? *Neurochirurgie* **2001**, *47*, 133–136.
42. Deng, S.L.; Wang, Y.B.; Wang, D.H.; Zhan, S.; Jing, Y.; Guan, Y. Malignant Transformation and Metastatic Spread of Dumbbell-Shaped Meningeal Melanocytoma of the Cervical Spine: A Case Report and Literature Review. *Front. Surg.* **2022**, *9*, 789256. <https://doi.org/10.3389/fsurg.2022.789256>.
43. Doglietto, F.; Colosimo, C.; Lauriola, L. et al. Intracranial melanocytic meningeal tumours and melanosis oculi: case report and literature review. *BMC Cancer* **2012**, *12*, 220. <https://doi.org/10.1186/1471-2407-12-220>.
44. Donofrio, C.A.; Roncaroli, F.; Riccio, L.; Pereira, M.; O'Sullivan, J.; Mayers, H.; Potter, G.M.; Djoukadar, I.; Rutherford, S.A. A Challenging Case of Sporadic Melanocytoma of the Jugular Foramen. *Neurochirurgie* **2021**, *68*, 453–457. <https://doi.org/10.1016/j.neuchi.2021.06.001>.
45. Dorwal, P.; Gautam, D.; Mohapatra, I.; Gupta, A. Intramedullary Melanocytoma of Thoracic Spine: A Rare Case Report. *Asian J. Neurosurg.* **2014**, *9*, 36. <https://doi.org/10.4103/1793-5482.131068>.
46. El-Khashab, M.; Koral, K.; Bowers, D.C.; Johnson-Welch, S.; Swift, D.; Nejat, F. Intermediate Grade Meningeal Melanocytoma of Cervical Spine. *Childs Nerv. Syst.* **2009**, *25*, 407–410. <https://doi.org/10.1007/s00381-008-0782-6>.

47. Elbadry, R.; Elazim, A.A.; Mohamed, K.; Issa, M.; Ayyad, A. Primary Meningeal Melanocytoma of the Cerebellopontine Angle Associated with Ipsilateral Nevus of Ota: A Case Report. *Surg. Neurol. Int.* **2018**, *9*, 245. [https://doi.org/10.4103/SNI.SNI\\_235\\_18](https://doi.org/10.4103/SNI.SNI_235_18).
48. Eskandari, R.; Schmidt, M.H. Intramedullary Spinal Melanocytoma. *Rare Tumors* **2010**, *2*, 64–67. <https://doi.org/10.4081/rt.2010.e24>.
49. Eun, S.S.; Kim, H.S.; Lee, S.H.; Liu, W.C.; Lee, J.H. Spinal Meningeal Melanocytoma in the S-1 Nerve Root Sheath with Paraspinal Extension Mimicking Schwannoma. *World Neurosurg.* **2011**, *75*, 303–306.
50. Wang, F.; Ling, S. Primary Meningeal Melanocytoma in Sellar Region, Simulating a Nonfunctioning Pituitary Adenoma: Case Report and Literature Review. *World Neurosurg.* **2018**, *112*, 209–213. <https://doi.org/10.1016/j.wneu.2018.01.145>.
51. Wang, F.; Li, X.; Chen, L.; Pu, X. Malignant Transformation of Spinal Meningeal Melanocytoma. Case Report and Review of the Literature. *J. Neurosurg. Spine* **2007**, *6*, 451–454. <https://doi.org/10.3171/spi.2007.6.5.451>.
52. Wang, F.; Qiao, G.; Lou, X.; Song, X.; Chen, W. Malignant Transformation of Intracranial Meningeal Melanocytoma. Case Report and Review of the Literature. *Neuropathology* **2011**, *31*, 414–420. <https://doi.org/10.1111/j.1440-1789.2010.01160.x>.
53. Fagundes-Pereyra, W.J.; de Sousa, L.; Carvalho, G.T.C.; Pittella, J.E.H.; de Sousa, A.A. Meningeal Melanocytoma of the Posterior Fossa: Case Report and Literature Review. *Surg. Neurol.* **2005**, *63*, 269–274. <https://doi.org/10.1016/j.surneu.2004.05.035>.
54. Fan, M.; Wang, J.; Fu, W.; Liu, K.; Li, L.; Sun, P. Primary Meningeal Melanocytoma Located in Foramen Magnum: A Case Report and Review of the Literatures. *Chin. Med. Sci. J.* **2012**, *27*, 115–120.
55. Faro, S.H.; Koenigsberg, R.A.; Turtz, A.R.; Croul, S.E. Melanocytoma of the Cavernous Sinus: CT and MR Findings. *Am. J. Neuroradiol.* **1996**, *17*, 1087–1090.
56. Fernandez, C.; Hoeltzel, G.; Werner-Wasik, M.; Kenyon, L.C.; Shi, W. Definitive Radiotherapy for Meningeal Brainstem Melanocytoma: A Case Report. *Br. J. Neurosurg.* **2020**, 1–4. <https://doi.org/10.1080/02688697.2020.1864291>.
57. Ferracini, R.; Gardini, G.; Brisigotti, M.; Lanzanova, G.; Manetto, V.; Lorenzini, P. Metastasizing Meningeal Melanocytoma. *Tumori* **1980**, *66*, 405–408.
58. Flores, A.; Gadot, R.; Noorbhai, I.; Hall, H.; Heck, K.A.; Raper, D.M.S.; Xu, D.; Karas, P.; Mandel, J.J.; Ropper, A.E. S-100-Negative, GNA11 Mutation-Positive Intramedullary Meningeal Melanocytoma of the Thoracic Spine: A Radiographic Challenge and Histologic Anomaly. *Surg. Neurol. Int.* **2021**, *12*, 315.
59. Foit, N.A.; Neidert, M.C.; Woernle, C.M.; Rushing, E.J.; Krayenbühl, N. Bifocal Extra- and Intradural Melanocytoma of the Spine: Case Report and Literature Review. *Eur. Spine J.* **2013**, *22*, 521–525.
60. Franken, S.P.G.; Setz-Pels, W.; Smink-Bol, M.; Gijtenbeek, J.M.M.; Nanda, D.; van der Maazen, R.W.M.; van der Vliet, T.; Busink, J. Unusual Case of Bifocal Leptomeningeal Melanocytoma in the Posterior Fossa with Seeding in the Spinal Canal. *Br. J. Radiol.* **2009**, *82*, e182–e188. <https://doi.org/10.1259/bjr/30756805>.
61. Gamoh, S.; Tsuno, T.; Akiyama, H.; Kotaki, S.; Nakanishi, T.; Tsuji, K.; Yoshida, H.; Shimizutani, K. Intracranial Meningeal Melanocytoma Diagnosed Using an Interdisciplinary Approach: A Case Report and Review of the Literature. *J. Med. Case Rep.* **2018**, *12*, 177. <https://doi.org/10.1186/s13256-018-1725-9>.
62. Ganesan, S.; Acharya, S.; Kalra, K.; Chahal, R. Intradural Intramedullary Primary Spinal Melanocytoma: A Rare Case Report. *Indian J. Neurosurg.* **2017**, *6*, 055–058. <https://doi.org/10.1055/s-0036-1584589>.
63. Gardiman, M.; Altavilla, G.; Marchioro, L.; Boscolo, L.; Alessio, L.; Piazza, M. Meningeal Melanocytoma: A Rare Lesion of The Central Nervous System. *Tumori J.* **1996**, *82*, 494–496.
64. Gempt, J.; Buchmann, N.; Grams, A.E.; Zoubaa, S.; Schlegel, J.; Meyer, B.; Ringel, F. Black Brain: Transformation of a Melanocytoma with Diffuse Melanocytosis into a Primary Cerebral Melanoma. *J. Neurooncol.* **2011**, *102*, 323–328. <https://doi.org/10.1007/s11060-010-0311-9>.
65. Gill Naul, L.; Hise, J.H.; Bauserman, S.C.; Todd, F.D. CT and MR of Meningeal Melanocytoma; *AJNR Am J Neuroradiol* **1991**, 315–316.
66. Gonçalves, J.; Díaz, P.; Maíllo, A.; Blanco, A.; Subhi-Issa, I. Melanocitoma Meníngeo Cervical Simulando Un Neurinoma de La Raíz C7: Caso Clínico. *Neurocirugia* **2002**, *13*, 393–396. [https://doi.org/10.1016/S1130-1473\(02\)70595-2](https://doi.org/10.1016/S1130-1473(02)70595-2).
67. González-Tortosa, J.; Ros de San Pedro, J.; Ferri-Ñíguez, B. Melanocitoma Meníngeo Del Ángulo Pontocerebeloso: ¿Un Tumor Benigno? *Neurocirugia* **2009**, *20*, 372–379. [https://doi.org/10.1016/S1130-1473\(09\)70157-5](https://doi.org/10.1016/S1130-1473(09)70157-5).
68. Goyal, A.; Sinha, S.; Singh, A.K.; Tatke, M.; Kansal, A. Lumbar Spinal Meningeal Melanocytoma of the L3 Nerve Root with Paraspinal Extension: A Case Report. *Spine (Phila Pa 1976)* **2003**, *28*, E140–E142. <https://doi.org/10.1097/01.BRS.0000051879.20360.8A>.
69. Gupta, A.; Ahmad, F.U.; Sharma, M.C.; Garg, A.; Mehta, V.S. Cerebellopontine Angle Meningeal Melanocytoma: A Rare Tumor in an Uncommon Location. Case Report. *J. Neurosurg.* **2007**, *106*, 1094–1097. <https://doi.org/10.3171/jns.2007.106.6.1094>.
70. Hamasaki, O.; Nakahara, T.; Sakamoto, S.; Kutsuna, M.; Sakoda, K. Intracranial Meningeal Melanocytoma-Case Report. *Neurol. Med. -Chir.* **2002**, *42*, 504–509.
71. Hean, V.; Bouleftour, W.; Ramirez, C.; Forest, F.; Boutet, C.; Rivoirard, R. Nivolumab as Adjuvant Treatment for a Spinal Melanocytoma: A Case Report. *Medicine* **2021**, *100*, e25862. <https://doi.org/10.1097/MD.00000000000025862>.
72. Hino, K.; Nagane, M.; Fujioka, Y.; Shiokawa, Y. Meningeal Melanocytoma Associated with Ipsilateral Nevus of Ota Presenting as Intracerebral Hemorrhage: Case Report. *Neurosurgery* **2005**, *56*, E1376. <https://doi.org/10.1227/01.neu.0000159716.45457.bc>.

73. Hioki, A.; Miyamoto, K.; Kato, H.; Hatano, Y.; Asano, N.; Hirose, Y.; Fushimi, K.; Shimizu, K. Sudden Onset of Paraplegia Caused by Subarachnoid Hemorrhage Associated with Meningeal Melanocytoma of the Conus Medullaris: A Case Report of Intraoperative Identification of These Two Pathological Conditions. *Eur. J. Orthop. Surg. Traumatol.* **2012**, *22*, 593–596.
74. Hirose, T.; Horiguchi, H.; Kaneko, F.; Kusaka, K.; Morizumi, H.; Seki, K.; Sano, T. Melanocytoma of the Foramen Magnum. *Pathol. Int.* **1997**, *47*, 155–160. <https://doi.org/10.1111/j.1440-1827.1997.tb03733.x>.
75. Hoffmann, M.; Koelsche, C.; Seiz-Rosenhagen, M.; Mai, S.; Lohr, F.; Reuss, D.; Wenz, F.; Gebhardt, C.; Giordano, F.A. The GNAQ in the Haystack: Intramedullary Meningeal Melanocytoma of Intermediate Grade at T9–10 in a 58-Year-Old Woman. *J. Neurosurg.* **2016**, *125*, 53–56. <https://doi.org/10.3171/2015.5.JNS15233>.
76. Horn, E.M.; Nakaji, P.; Coons, S.W.; Dickman, C.A. Surgical Treatment for Intramedullary Spinal Cord Melanocytomas. *J. Neurosurg. Spine* **2008**, *9*, 48–54. <https://doi.org/10.3171/SPI/2008/9/7/048>.
77. Hou, G.Q.; Sun, J.C.; Zhang, X.J.; Shen, B.X.; Zhu, X.J.; Liang, L.; Zhang, X.L. MR Imaging Findings of the Intraspinal Meningeal Melanocytoma: Correlation with Histopathologic Findings. *Am. J. Neuroradiol.* **2012**, *33*, 1525–1529. <https://doi.org/10.3174/ajnr.A2987>.
78. Ibáñez, J.; Weil, B.; Ayala, A.; Jimenez, A.; Acedo, C.; Rodrigo, I. Meningeal Melanocytoma: Case Report and Review of the Literature. *Histopathology* **1997**, *30*, 576–581. <https://doi.org/10.1046/j.1365-2559.1997.5660798.x>.
79. Iida, M.; Llena, J.F.; Suarez, M.A.; Malik, S.; Weidenheim, K.M.; LaSala, P.; Hirano, A. Two Cases of Spinal Meningeal Melanocytoma. *Brain Tumor Pathol.* **2002**, *19*, 41–45. <https://doi.org/10.1007/BF02482455>.
80. Lee, J.K.; Rho, Y.J.; Jeong, D.M.; Rhim, S.C.; Kim, S.J. Diagnostic Clue of Meningeal Melanocytoma: Case Report and Review of Literature. *Yonsei Med. J.* **2017**, *58*, 467–470.
81. Jellinger, K.; Böck, F.; Brenner, H. Meningeal Melanocytoma. Report of a Case and Review of the Literature. *Acta Neurochir.* **1988**, *94*. <https://doi.org/10.1007/BF01406621>.
82. Seo, J.S.; Ahn, S.S.; Choi, J.H.; Choi, H.J. Primary Meningeal Melanocytoma in the Thoracic Spine — A Case Report. *Korean J. Spine* **2011**, *8*, 121–124.
83. Das, K.; Nair, A.; Jaiswal, S.; Sahu, R.; Srivastava, A.; Kumar, R.; Mehrotra, A. Supratentorial Intermediate Grade Meningeal Melanocytoma with Intratumoral Bleed in the Background of Neurocutaneous Melanosis: Report of an Unusual Case and Review of Literature. *Asian J. Neurosurg.* **2017**, *12*, 98. <https://doi.org/10.4103/1793-5482.145113>.
84. Kang, S.-G.; Yoo, D.S.; Cho, K.S.; Kim, D.S.; Chang, E.D.; Huh, P.W.; Kim, M.C. Coexisting Intracranial Meningeal Melanocytoma, Dermoid Tumor, and Dandy-Walker Cyst in a Patient with Neurocutaneous Melanosis. Case Report. *J. Neurosurg.* **2006**, *104*, 444–447. <https://doi.org/10.3171/jns.2006.104.3.444>.
85. Khadilkar, U.N.; Agarwal, N.; Deeshma; Bhat, V. Primary Meningeal Melanocytoma. *Kathmandu Univ. Med. J. (KUMJ)* **6**.
86. Kim, O.H.; Kim, S.J.; Choo, H.J.; Lee, S.J.; Lee, I.S.; Kim, J.Y.; Kim, H. Spinal Meningeal Melanocytoma with Benign Histology Showing Leptomeningeal Spread: Case Report. *Korean J. Radiol.* **2013**, *14*, 470–476. <https://doi.org/10.3348/kjr.2013.14.3.470>.
87. Kini, J.R.; Jeyraj, V.; Jayaprakash, C.S.; Indira, S.; Naik, C.N.R.; Rao, D. Intraoperative Smear Cytology of Meningeal Melanocytoma of the Posterior Fossa. *Cytopathology* **2009**, *20*, 59–62. <https://doi.org/10.1111/j.1365-2303.2007.00536.x>.
88. Kinnen, F.; Fleck, S.K.; Baldauf, J.; Hans, V.; Daeschlein, G.; Rathmann, E.; Schroeder, H.W.S.; Marx, S. Primary Lep-tomeningeal Melanocytic Tumors of the Spine: Report of Two Cases and Review of the Literature. *World Neurosurg.* **2019**, *124*, 228–236. <https://doi.org/10.1016/j.wneu.2019.01.015>.
89. Koch, H.J.; Roeber, S.; Zimmermann, U.W.; Schäfer, C.; Villarrubia, V.; Kuchelmeister, K.; Schachenmayr, W.; Bogdahn, U.; Steinbrecher, A. Spinale Und Zerebrale Meningeosis Eines Sekundär Malignisierten Melanozytoms Des Kleinhirnbrückenwinkels. *Wien. Med. Wochenschr.* **2005**, *155*, 360–364.
90. Koenigsmann, M.; Jautzke, G.; Unger, M.; Théallier-Janko, A.; Wiegel, T.; Stoltenburg-Didinger, G. June 2002: 57-Year-Old Male with Leptomeningeal and Liver Tumors Clinical History, Radiology and Microscopic Description. *Brain Pathol.* **2002**, *12*, 519.
91. Kordás, M.; Cziráj, S.; Slowik, F. Primary Meningeal Melanocytoma of the Spinal Cord: Report of a Paediatric Case with Benign Course and Review of the Literature. *Eur. J. Neurol.* **1996**, *3*, 141–145. <https://doi.org/10.1111/j.1468-1331.1996.tb00206.x>.
92. Kraft Roverea, R.; Dagnonia, C.; Gomes de Oliveiraa, G.; Sapellia, J. Meningeal Melanocytoma: Case Report and Literature Review. *Bol. De La Asoc. Med. De Puerto Rico* **2014**, *106*, 30–32.
93. Kuo, K.L.; Lin, C.L.; Wu, C.H.; Chang, C.H.; Tsai, H.P.; Loh, J.K.; Lieu, A.S.; Su, Y.F. Meningeal Melanocytoma Associated with Nevus of Ota: Analysis of Twelve Reported Cases. *World Neurosurg.* **2019**, *127*, e311–e320. <https://doi.org/10.1016/j.wneu.2019.03.113>.
94. Kurita, H.; Segawa, H.; Shin, M.; Ueki, K.; Ichi, S.; Sasaki, T.; Tago, M.; Kirino, T. Radiosurgery of Meningeal Melanocytoma. *J. Neuro-Oncol.* **2000**, *46*, 57–61.
95. Küsters-Vandeveld, H.V.N.; Kruse, V.; van Maerken, T.; Boterberg, T.; Pfundt, R.; Creytens, D.; van den Broecke, C.; Machiels, T.C.; Koelsche, C.; von Deimling, A.; et al. Copy Number Variation Analysis and Methyloome Profiling of a GNAQ-Mutant Primary Meningeal Melanocytic Tumor and Its Liver Metastasis. *Exp. Mol. Pathol.* **2017**, *102*, 25–31. <https://doi.org/10.1016/j.yexmp.2016.12.006>.
96. Lach, B.; Russell, N.; Benoit, B.; Atack, D. Cellular Blue Nevus (“melanocytoma”) of the Spinal Meninges: Electron Microscopic and Immunohistochemical Features. *Neurosurgery* **1988**, *22*, 773–780. <https://doi.org/10.1227/00006123-198804000-00030>.
97. Leonardi, M.A.; Lumenta, C.B.; Elzle, A.S.; Mu, J.; Ecker, E.-H. Unusual Clinical Presentation of a Meningeal Melanocytoma with Seizures: Case Report and Review of the Literature. *Acta Neurochir.* **1998**, *140*, 621–628.

98. Limas, C.; Tio, F.O. Meningeal Melanocytoma ("melanotic Meningioma"). Its Melanocytic Origin as Revealed by Electron Microscopy. *Cancer* **1972**, *30*, 1286–1294. [https://doi.org/10.1002/1097-0142\(197211\)30:5<1286::aid-cnrc2820300522>3.0.co;2-v](https://doi.org/10.1002/1097-0142(197211)30:5<1286::aid-cnrc2820300522>3.0.co;2-v).
99. Lin, B.; Yang, H.; Qu, L.; Li, Y.; Yu, J. Primary Meningeal Melanocytoma of the Anterior Cranial Fossa: A Case Report and Review of the Literature. *World J. Surg. Oncol.* **2012**, *10*, 135.
100. Lee, S.-U.; Kim, H.-J.; Choi, J.-Y.; Kim, J.-S. Lower Brainstem Melanocytoma Masquerading as Vestibular Paroxysmia. *J. Neurol.* **2018**, *265*, 1222–1225. <https://doi.org/10.1007/s00415-018-8868-x>.
101. Litofsky, N.S.; Zee, C.S.; Breeze, R.E.; Chandrasoma, P.T. Meningeal Melanocytoma: Diagnostic Criteria for a Rare Lesion. *Neurosurgery* **1992**, *31*, 945–950. <https://doi.org/10.1227/00006123-199211000-00019>.
102. Maaloul, I.; Moussaoui, M.; Salah, A.; Feki, W.; Fourati, H.; Charfi, N.; Mnif, Z. Suprasellar Melanocytoma with Lep-tomeningeal Seeding: An Aggressive Clinical Course for a Histologically Benign Tumor. *Case Rep. Radiol.* **2021**, *2021*, 7306432. <https://doi.org/10.1155/2021/7306432>.
103. Maiuri, F.; Iaconetta, G.; Benvenuti, D.; Lamaida, E.; de Caro, M.L. Intracranial Meningeal Melanocytoma: Case Report. *Surg. Neurol.* **1995**, *44*, 504–509. [https://doi.org/10.1016/0090-3019\(95\)00182-4](https://doi.org/10.1016/0090-3019(95)00182-4).
104. Malik, A.; Goyal, M.; Gambhir, M.; Patir, R.; Mishra, N.K.; Gaikwad, S.; Sharma, M.C. Imaging Appearances of Meningeal Melanocytoma. *J. Clin. Neurosci.* **1999**, *6*, 264–265. [https://doi.org/10.1016/s0967-5868\(99\)90520-9](https://doi.org/10.1016/s0967-5868(99)90520-9).
105. Mangels, K.J.; Johnson, M.D.; Weil, R.J. 35-Year-Old Woman with Progressive Bilateral Leg Weakness. *Brain Pathol.* **2006**, *16*, 183–184. [https://doi.org/10.1111/j.1750-3639.2006.00003\\_2.x](https://doi.org/10.1111/j.1750-3639.2006.00003_2.x).
106. Marwaha, N.; Batanian, J.R.; Coppens, J.R.; Pierson, M.J.; Richards-Yutz, J.; Ebrahimzadeh, J.; Ganguly, A.; Guzman, M.A. Subcutaneous Melanocytoma Mimicking a Lipoma: A Rare Presentation of a Rare Neoplasm with Histological, Immunohistochemical, Cytogenetic and Molecular Characterization. *J. Cutan. Pathol.* **2016**, *43*, 1186–1196. <https://doi.org/10.1111/cup.12808>.
107. Mathai, A.M.; Naik, R.; Pai, M.R.; Kini, J.R.; Kumar, S.; Ballal, C.K. Orbital Melanocytoma. *Orbit* **2008**, *27*, 383–387. <https://doi.org/10.1080/01676830802333626>.
108. Matsumoto, S.; Kang, Y.; Sato, S.; Kawakami, Y.; Oda, Y.; Araki, M.; Kawamura, J.; Uchida, H. Spinal Meningeal Melanocytoma Presenting with Superficial Siderosis of the Central Nervous System. Case Report and Review of the Literature. *J. Neurosurg.* **1998**, *88*, 890–894. <https://doi.org/10.3171/jns.1998.88.5.0890>.
109. Matsuno, H.; Takasu, S.; Seki, Y. Usefulness of Neuromelanin Sensitive MRI for En Plaque Meningeal Melanocytoma Involving the Cavernous Sinus: A Case Report. *NMC Case Rep. J.* **2019**, *6*, 43–46. <https://doi.org/10.2176/nmccrj.cr.2018-0211>.
110. Merciadri, P.; Secci, F.; Sbaffi, P.F.; Zona, G. Multifocal Meningeal Melanocytoma of the Conus Medullaris. *Acta Neurochir.* **2011**, *153*, 2283–2285. <https://doi.org/10.1007/s00701-011-1143-x>.
111. Mitchell, P.J.; Funt, S.A. Hemiballismus and Meningioma/Pineal and Meningeal Melanomatosis Case Reports.
112. Miura, I.; Kubota, M.; Momosaki, O.; Nyui, M.; Takebayashi, K.; Kawamata, T.; Yuzurihara, M. A Rapidly Growing Cervical Meningeal Melanocytoma with a Dumbbell-Shaped Extension. *World Neurosurg.* **2020**, *134*, 90–93. <https://doi.org/10.1016/j.wneu.2019.10.150>.
113. Muñoz-Hidalgo, L.; Lopez-Gines, C.; Navarro, L.; Callaghan, R.C.; San Miguel, T.; Gil-Benso, R.; Quilis, V.; Botella, L.; Gonzalez-Darder, J.; Cerda-Nicolas, M. BRAF V600E Mutation in Two Distinct Meningeal Melanocytomas Associated With a Nevus of Ota. *J. Clin. Oncol. Off. J. Am. Soc. Clin. Oncol.* **2014**, *32*, e72–e75.
114. Muthappan, M.; Muthu, T.; Hussain, Z.; Lamont, D.; Balakrishnan, V. Cervical Intramedullary Melanocytoma: A Case Report and Review of Literature. *J. Clin. Neurosci.* **2012**, *19*, 1450–1453. <https://doi.org/10.1016/j.jocn.2011.09.040>.
115. Lee, N.K.; Lee, J.Y.; Wang, K.C.; Kim, D.G.; Park, S.H.; Cheon, J.E.; Phi, J.H.; Kim, S.K. Primary Atypical Melanocytoma Arising from the Cavernous Sinus in a Child. *Child's Nerv. Syst.* **2015**, *31*, 1577–1582. <https://doi.org/10.1007/s00381-015-2741-3>.
116. Nakahara, K.; Morota, N.; Ihara, S.; Oka, H.; Matsuoka, K.; Nakagawa, A. Meningeal Melanocytoma Extruded From the Skull of a Neonate-Case Report. *Neurol. Med. -Chir.* **2010**, *50*, 240–242.
117. Navas, M.; Pascual, J.M.; Fraga, J.; Pedrosa, M.; Shakur, S.; Carrasco, R.; Martínez, P.; Manzanares, R.; Sola, R.G. Intracranial Intermediate-Grade Meningeal Melanocytoma with Increased Cellular Proliferative Index: An Illustrative Case Associated with a Nevus of Ota. *J. Neurooncol.* **2009**, *95*, 105–115. <https://doi.org/10.1007/s11060-009-9907-3>.
118. Nicolotto, E.; Presas-Rodriguez, S.; Morra, I.; Franchino, F.; Magistrello, M.; Pellerino, A.; Massaro, F.; Pinessi, L.; Rudà, R.; Soffietti, R. Spinal Melanocytoma with Leptomeningeal Spread and Long Survival Following Surgery and Chemotherapy. *J. Neurosurg. Sci.* **2018**, *62*, 375–378. <https://doi.org/10.23736/S0390-5616.16.03687-0>.
119. Offiah, C.J.; Laitt, R.D. Intracranial Meningeal Melanocytoma: A Cause of High. Signal on T1-and Low Signal on T2-Weighted MRI. *Clin. Radiol.* **2006**, *61*, 294–298.
120. Oruckaptan, H.H.; Soylemezoglu, F.; Kutluk, T.; Akalan, N. Benign Melanocytic Tumor in Infancy: Discussion on a Rare Case and Review of the Literature. *Pediatr. Neurosurg.* **2000**, *32*, 240–247. <https://doi.org/10.1159/000028945>.
121. Painter, T.J.; Chaljub, G.; Sethi, R.; Singh, H.; Gelman, B. Intracranial and Intraspinal Meningeal Melanocytosis. *Am. J. Neuro-radiol.* **2000**, *21*, 1349–1353.
122. Palicelli, A.; Disanto, M.G.; Panzarasa, G.; Veggiani, C.; Galizia, G.; Dal Cin, S.; Gruppioni, E.; Boldorini, R. Orbital Meningeal Melanocytoma: Histological, Immunohistochemical and Molecular Characterization of a Case and Review of the Literature. *Pathol. Res. Pract.* **2016**, *212*, 946–953. <https://doi.org/10.1016/j.prp.2016.07.009>.
123. Pan, H.; Wang, H.; Fan, Y. Intracranial Meningeal Melanocytoma Associated with Nevus of Ota. *J. Clin. Neurosci.* **2011**, *18*, 1548–1550. <https://doi.org/10.1016/j.jocn.2011.01.040>.



124. Perrini, P.; Caniglia, M.; Pieroni, M.; Castagna, M.; Parenti, G.F. Malignant Transformation of Intramedullary Melanocytoma: Case Report. *Neurosurgery* **2010**, *67*, E867–E869. <https://doi.org/10.1227/01.NEU.0000372919.96651.34>.
125. Phang, I.; Elashaal, R.; Ironside, J.; Eljamel, S. Primary Cerebellopontine Angle Melanocytoma: Review. *J. Neurol. Surg. Rep.* **2012**, *73*, 025–031. <https://doi.org/10.1055/s-0032-1311756>.
126. Piercecchi-Marti, M.-D.; Mohamed, H.; Liprandi, A.; Gambarelli, D.; Grisoli, F.; Pellissier, J.-F. Intracranial Meningeal Melanocytoma Associated with Ipsilateral Nevus of Ota. Case Report. *J. Neurosurg.* **2002**, *96*, 619–623. <https://doi.org/10.3171/jns.2002.96.3.0619>.
127. Pierson, M.; Marwaha, N.; Guzman, M.; Mikulec, A.A.; Coppens, J.R. Multifocal Melanocytoma of the Posterior Fossa and Subcutaneous Scalp in the Absence of Neurocutaneous Melanosis. *Surg. Neurol. Int.* **2016**, *7*, S591–S595. <https://doi.org/10.4103/2152-7806.189728>.
128. Prabhu, S.S.; Lynch, P.G.; Keogh, A.J.; Parekh, H.C. Intracranial Meningeal Melanocytoma: A Report of Two Cases and a Review of the Literature. *Surg. Neurol.* **1993**, *40*, 516–521. [https://doi.org/10.1016/0090-3019\(93\)90058-9](https://doi.org/10.1016/0090-3019(93)90058-9).
129. Rades, D.; Heidenreich, F.; Tatagiba, M.; Brandis, A.; Karstens, J.H. Therapeutic Options for Meningeal Melanocytoma. Case Report. *J. Neurosurg.* **2001**, *95*, 225–231. <https://doi.org/10.3171/spi.2001.95.2.0225>.
130. Rahimi-Movaghar, V.; Karimi, M. Meningeal Melanocytoma of the Brain and Oculodermal Melanocytosis (Nevus of Ota): Case Report and Literature Review. *Surg. Neurol.* **2003**, *59*, 200–210. [https://doi.org/10.1016/s0090-3019\(02\)01052-2](https://doi.org/10.1016/s0090-3019(02)01052-2).
131. Rai, S.; Sharma, M.; Naik, R.; Sinha, R.; Philipose, R.; Verghese, R. Melanocytoma of Cerebellum. *Indian J. Pathol. Microbiol.* **2008**, *51*, 47. <https://doi.org/10.4103/0377-4929.40394>.
132. Reddy, R.; Krishna, V.; Prasad Sahu, B.; Uppin, M.; Sundaram, C. Multifocal Spinal Meningeal Melanocytoma: An Illustrated Case Review. *Turk. Neurosurg.* **2012**, *22*, 791–794. <https://doi.org/10.5137/1019-5149.JTN.4322-11.1>.
133. Roser, F.; Nakamura, M.; Brandis, A.; Hans, V.; Vorkapic, P.; Samii, M. Transition from Meningeal Melanocytoma to Primary Cerebral Melanoma. Case Report. *J. Neurosurg.* **2004**, *101*, 528–531. <https://doi.org/10.3171/jns.2004.101.3.0528>.
134. Ren, Y.; Xiao, A.; Wu, X.; Zhang, Y. Meningeal Melanocytoma of the Middle Cranial Fossa (the Meckel's Cave). *Neurol. India* **2015**, *63*, 260.
135. Rousseau, A.; Bernier, M.; Kujas, M.; Varlet, P. Primary Intracranial Melanocytic Tumor Simulating Pituitary Macroadenoma: Case Report and Review of the Literature. *Neurosurgery* **2005**, *57*, E369. <https://doi.org/10.1227/01.neu.0000166686.19823.a9>.
136. Ruelle, A.; Tunesi, G.; Andrioli, G. Spinal Meningeal Melanocytoma. Case Report and Analysis of Diagnostic Criteria. *Neurosurg. Rev.* **1996**, *19*, 39–42.
137. Rutten, I.; Bolle, S.; Kaschten, B.; Stevenaert, A.; Deneufbourg, J.M.; Deprez, M. Recurrent Intracranial Melanocytoma Associated with a Nevus of Ota. *Acta Neurochir.* **2005**, *147*, 313–315. <https://doi.org/10.1007/s00701-004-0457-3>.
138. Sakar, M.; Erdogan, O.; Bozkurt, S.U.; Dagcinar, A. Intermediate-Grade Meningeal Melanocytoma in a 19 Months Old Child with Difficulties in Differential Diagnosis and Management. *Turk. Neurosurg.* **2022**, *32*, 166–170. <https://doi.org/10.5137/1019-5149.jtn.34672-21.4>.
139. Sakata, K.; Miyoshi, J.; Takeshige, N.; Komaki, S.; Miyagi, N.; Nakashima, S.; Morioka, M.; Sugita, Y. Primary Meningeal Melanocytoma of the Sellar Region: Review of the Literature and Differential Diagnosis with Special Reference to Angio-graphical Features. *Pituitary* **2015**, *18*, 685–694. <https://doi.org/10.1007/s11102-015-0635-8>.
140. Salah El-Din, A.M.; Aboul-Ela, H.M.; Alsawy, M.F.; Koheil, A.; Ashry, A.H. Spinal Meningeal Melanocytoma in a 5-Year-Old Child: A Case Report and Review of Literature. *Egypt. J. Neurol. Psychiatry Neurosurg.* **2018**, *54*, 13. <https://doi.org/10.1186/s41983-018-0017-z>.
141. Samadian, M.; Nejad, A.M.; Bakhtevary, M.H.; Sabeti, S.; Sharifi, G.; Jabbari, R.; Rezaei, O. Primary Meningeal Melanocytoma in the Left Temporal Lobe Associated with Nevus Ota: A Case Report and Review of the Literature. *World Neurosurg.* **2015**, *84*, 567–573. <https://doi.org/10.1016/j.wneu.2015.03.061>.
142. Samimi, K.; Gharib, M.H.; Rezaei-Kalantari, K.; Jafari, M. Unusual Tonsillar Herniation in Meningeal Melanocytoma: A Case Report. *Iran. J. Radiol.* **2012**, *9*, 227–230. <https://doi.org/10.5812/iranjrad.8766>.
143. San-Miguel, T.; Navarro, L.; Sanchez-Sendra, B.; Megias, J.; Muñoz-Hidalgo, L.; Santonja, N.; Lopez-Gines, C.; Cerda-Nicolas, M. Identification of a Novel BRCA1 Alteration in Recurrent Melanocytoma Resulting in Increased Proliferation. *J. Neuropathol. Exp. Neurol.* **2020**, *79*, 1233–1238. <https://doi.org/10.1093/JNEN/NLAA089>.
144. Sankhla, S.K.; Lynch, P.G.; Davis, C.H. Spinal Meningeal Melanocytoma: A Case Report and Review of the Literature. *Br. J. Neurosurg.* **1996**, *10*, 205–210. <https://doi.org/10.1080/02688699650040395>.
145. Sato, K.; Kubota, T.; Koderu, T.; Kitai, R.; Takeuchi, H.; Yoshida, K. Melanocytoma in the Orbital Apex. *J. Neurooncol.* **2009**, *92*, 107–110. <https://doi.org/10.1007/s11060-008-9723-1>.
146. Schembri, M.; Kok, H.K.; Brennan, P.; O'Hare, A.; Thornton, J.; Looby, S.; Asadi, H. Mystery Case: Dural Melanocytoma with Leptomeningeal Melanocytosis. *Neurology* **2017**, *88*, e70–e71.
147. Schindler, C.U.; Kuchelmeister, K.; Richter, H.P.; Schachenmayr, W. Meningeal Melanocytoma. *Pathologe* **1998**, *19*. <https://doi.org/10.1007/s002920050292>.
148. Sethi, D.; Duhan, A.; Sen, R.; Goyal, V.; Modi, S. Spinal Meningeal Melanocytoma. *Asian J. Neurosurg.* **2011**, *6*, 111. <https://doi.org/10.4103/1793-5482.92176>.
149. Shaikh, S.; Gupta, G.; Mohanty, C.; Deopujari, C. Spinal Nerve Root Extradural Melanocytoma Progressing to Malignant Melanoma: A Case Report with Review of Literature. *Asian J. Neurosurg.* **2021**, *16*, 394. [https://doi.org/10.4103/ajns.ajns\\_416\\_20](https://doi.org/10.4103/ajns.ajns_416_20).

150. Shanthi, V.; Ramakrishna, B.A.; Bheemaraju, V.V.; Rao, N.M.; Murthy Athota, V.R. Spinal Meningeal Melanocytoma: A Rare Meningeal Tumor. *Ann. Indian Acad. Neurol.* **2010**, *13*, 308–310. <https://doi.org/10.4103/0972-2327.74192>.
151. Sharma, V.; Bhaskar, S.; Kumar, A.; Bhardwaj, M. Conus Melanocytoma: A Rare Spinal Tumor. *Neurology* **2019**, *67*, 591.
152. Shimoda, H.; Oka, K.; Naoi, Y.; Nishida, S.; Oka, T.; Nakazato, Y.; Mori, N. Primary Melanocytoma Arising from the Thoracic Leptomeninges Case. *Clin. Neuropathol.* **1999**, *18*, 80–83.
153. Shin, D.; Lee, K.J.; Adeluwa, T.; Hur, J. Machine Learning-Based Predictive Modeling of Postpartum Depression. *J. Clin. Med.* **2020**, *9*, 2899. <https://doi.org/10.3390/jcm9092899>.
154. Shinoda, K.; Hayasaka, S.; Nagaki, Y.; Kadoi, C.; Kurimoto, M.; Okada, E. Melanocytoma of the Left Optic Nerve Head and Right Retrobulbar Optic Neuropathy Compressed by a Tuberculum Sellae Meningioma. *Ophthalmologica* **2000**, *214*, 161–163. <https://doi.org/10.1159/000027489>.
155. Shownkeen, H.N.; Harmath, C.; Thomas, C. Multiform Cervical Melanocytoma: A Case Report. *Neuroradiology* **2002**, *44*, 1008–1010. <https://doi.org/10.1007/s00234-002-0875-y>.
156. Srirama Jayamma, S.; Sud, S.; Buxi, T.; Madan, V.; Goyal, A.; Dhawan, S. Cervical Spinal Meningeal Melanocytoma Presenting as Intracranial Superficial Siderosis. *Case Rep. Radiol.* **2015**, *2015*, 674868. <https://doi.org/10.1155/2015/674868>.
157. Steinberg, J.M.; Gillespie, J.J.; MacKay, B.; Benjamin, R.S.; Leavens, M.E. Meningeal Melanocytoma with Invasion of the Thoracic Spinal Cord. Case Report. *J. Neurosurg.* **1978**, *48*, 818–824. <https://doi.org/10.3171/jns.1978.48.5.0818>.
158. Sun, J.; Wang, C.; Shu, Q.; Liu, J.; Mao, G. Case Report A Case Report on Intermediate-Grade Malignant Meningeal Melanocytoma with Elevated Cell Proliferation Index. *Int. J. Clin. Exp. Pathol.* **2015**, *8*, 11698.
159. Sung Hye Park, M.D.; Heum Rye Park, M.D.; Yong Ko, M.D. Spinal Meningeal Melanocytoma. *J. Korean Med. Sci.* **1992**, *7*, 364–368.
160. O'Brien, T.F.; Moran, M.; Miller, J.H.; Hensley, S.D. Meningeal Melanocytoma. An Uncommon Diagnostic Pitfall in Surgical Neuropathology. *Arch. Pathol. Lab. Med.* **1995**, *119*, 542–546.
161. Tatagiba, M.; Böker, D.K.; Brandis, A.; Samii, M.; Ostertag, H.; Babu, R. Meningeal Melanocytoma of the C8 Nerve Root: Case Report. *Neurosurgery* **1992**, *31*, 958–961. <https://doi.org/10.1227/00006123-199211000-00023>.
162. Tateyama, M.; Fujimoto, T.; Nakamura, T.; Miyamoto, T. Meningeal Melanocytoma Occurring at Epidural Region of the Cervical Spine. *Spine Surg. Relat. Res.* **2020**, *4*, 377–379. <https://doi.org/10.22603/SSRR.2020-0027>.
163. Tewari, M.K.; Radotra, B.D.; Sharma, B.S.; Mathuriya, S.N.; Pathak, A.; Banerjee, A.K.; Kak, V.K. Meningeal Melanocytoma: Report of Two Cases. *Indian J. Cancer* **1990**, *27*.
164. Tregnago, A.C.; Furlan, M.v.; Bezerra, S.M.; Porto, G.C.L.M.; Mendes, G.G.; Henklain, J.V.R.; Pinto, C.A.L.; Kowalski, L.P.; de Carvalho, G.B.; Costa, F.D. Orbital Melanocytoma Completely Resected with Conservative Surgery in Association with Ipsilateral Nevus of Ota: Report of a Case and Review of the Literature. *Head Neck* **2015**, *37*, E49–E55. <https://doi.org/10.1002/hed.23828>.
165. Tsai, M.-H.; Lin, W.-P.; Liao, W.-A.; Chiang, P.-Y.; Lin, Y.-C. Recurrent Spinal Meningeal Melanocytoma at Lumbar Spine Level: A Case Report. *Br. J. Neurosurg.* **2021**. <https://doi.org/10.1080/02688697.2020.1867062>.
166. Tsugu, H.; Nabeshima, K.; Matsumoto, S.; Omura, T.; Yahiro, T.; Oshiro, S.; Komatsu, F.; Abe, H.; Fukushima, T.; Inoue, T.; et al. A Case of a Heavily Pigmented Orbital Melanocytoma. *Brain Tumor Pathol.* **2009**, *26*, 25–29. <https://doi.org/10.1007/s10014-008-0242-8>.
167. Turhan, T.; Oner, K.; Yurtseven, T.; Akalin, T.; Ovul, I. Spinal Meningeal Melanocytoma. Report of Two Cases and Review of the Literature. *J. Neurosurg.* **2004**, *100*, 287–290.
168. Uematsu, Y.; Yukawa, S.; Yokote, H.; Itakura, T.; Hayashi, S.; Komai, N. Meningeal Melanocytoma: Magnetic Resonance Imaging Characteristics and Pathological Features. Case Report. *J. Neurosurg.* **1992**, *76*, 705–710. <https://doi.org/10.3171/jns.1992.76.4.0705>.
169. Uozumi, Y.; Kawano, T.; Kawaguchi, T.; Kaneko, Y.; Ooasa, T.; Ogasawara, S.; Yoshida, H.; Yoshida, T. Malignant Transformation of Meningeal Melanocytoma: A Case Report. *Brain Tumor Pathol.* **2003**, *20*, 21–25.
170. URAMARU, K.; SAKATA, K.; SHIMOHIGOSHI, W.; KAWASAKI, T.; MANAKA, H. Primary Meningeal Melanocytoma Located in the Craniovertebral Junction: A Case Report and Literature Review. *NMC Case Rep. J.* **2021**, *8*, 349–354. <https://doi.org/10.2176/nmccrj.cr.2020-0191>.
171. Vaidya, M.; Dhake, R.; Parikh, R.; Sabnis, M.; Sabnis, J. Recurrent Meningeal Melanocytoma of Cervical Spine: A Rare Case. *Asian J. Neurosurg.* **2021**, *16*, 159. [https://doi.org/10.4103/ajns.ajns\\_327\\_20](https://doi.org/10.4103/ajns.ajns_327_20).
172. Verma, D.S.; Spitzer, G.; Legha, S.; McCredie, K.B. Chemoimmunotherapy for Meningeal Melanocytoma of the Thoracic Spinal Cord. Report of a Case. *JAMA* **1979**, *242*, 2435–2436.
173. Vreto, G.; Rroji, A.; Xhumari, A.; Leka, L.; Rakacolli, M.; Petrela, M. Meningeal Melanocytoma of the Cerebellopontine Angle as the Unusual Cause of Superficial Siderosis. *Neuroradiology* **2011**, *53*, 927–930.
174. Winston, K.R.; Sotrel, A.; Schnitt, S.J. Meningeal Melanocytoma. Case Report and Review of the Clinical and Histological Features. *J. Neurosurg.* **1987**, *66*, 50–57. <https://doi.org/10.3171/jns.1987.66.1.0050>.
175. Xie, S.; Jiang, Z. Primary Spinal Cord Melanocytoma: A Case Report and Review of Literature. *Int. J. Clin. Exp. Pathol.* **2019**, *12*, 669–673.

176. Yang, C.; Fang, J.; Li, G.; Jia, W.; Liu, H.; Qi, W.; Xu, Y. Spinal Meningeal Melanocytomas: Clinical Manifestations, Radiological and Pathological Characteristics, and Surgical Outcomes. *J. Neurooncol.* **2016**, *127*, 279–286. <https://doi.org/10.1007/s11060-015-2006-8>.
177. Yin, M.; Ma, J.; Ye, J.; Xu, H.; Mo, W. 8-Year Follow-up for Woman with Spinal Meningeal Melanocytoma in S1 Nerve Root: Case Report and Literature Review. *World Neurosurg.* **2019**, *129*, 143–147. <https://doi.org/10.1016/j.wneu.2019.05.147>.
178. Yukawa, H.; Seki, H.; Sugawara, T.; Boku, N.; Higuchi, H.; Ono, S. A Case of Primary Meningeal Melanocytoma of the Left Middle Fossa. *No Shinkei Geka* **2003**, *31*, 1023–1028.
179. Zeiler, F.A.; Krcek, J.P. Plaque-Type Blue Nevus with Meningeal Melanocytomas. *Can. J. Neurol. Sci.* **2012**, *39*, 117–120.
180. Liu, Z.-Q. World Journal of Clinical Cases. Contents Thrice Mon. **2021**, *9*, 8280–8626.
181. Zhou, H.W.; Tran, A.Q.; North, V.S.; Zagzag, D.; Sen, C.; Kazim, M. GNA11 Mutation in an Intracranial Melanocytoma with Orbital Involvement and Nevus of Ota. *Ophthalmic. Plast. Reconstr. Surg.* **2021**, *38*, e47–e49. <https://doi.org/10.1097/IOP.0000000000002081>.
